# Supplementary material for: Polyhydroxybutyrate (PHB) Biosynthesis by an Engineered Yarrowia lipolytica Strain Using Co-Substrate Strategy
Source: MDPI journal article supplement (doi:10.3390/fermentation9121003), 2023-11-29
Supplement: s1 [file s1]

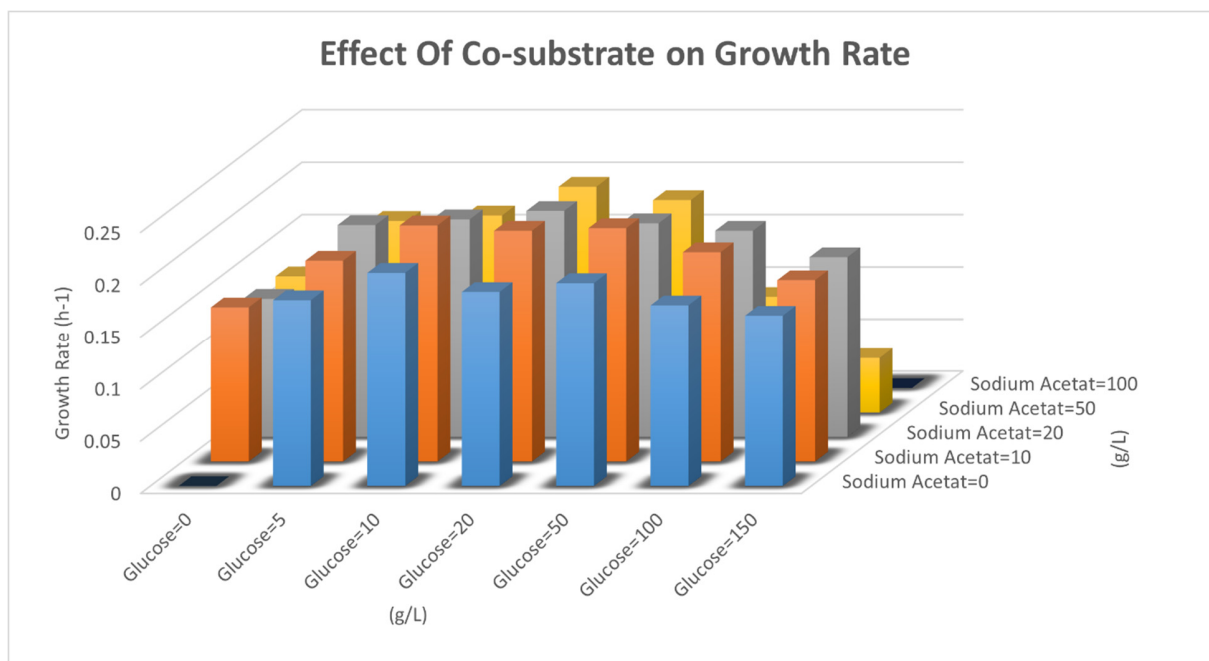

Figure S1: Effect of co-substrate culture on *Y. lipolytica* PHB32 growth rate.

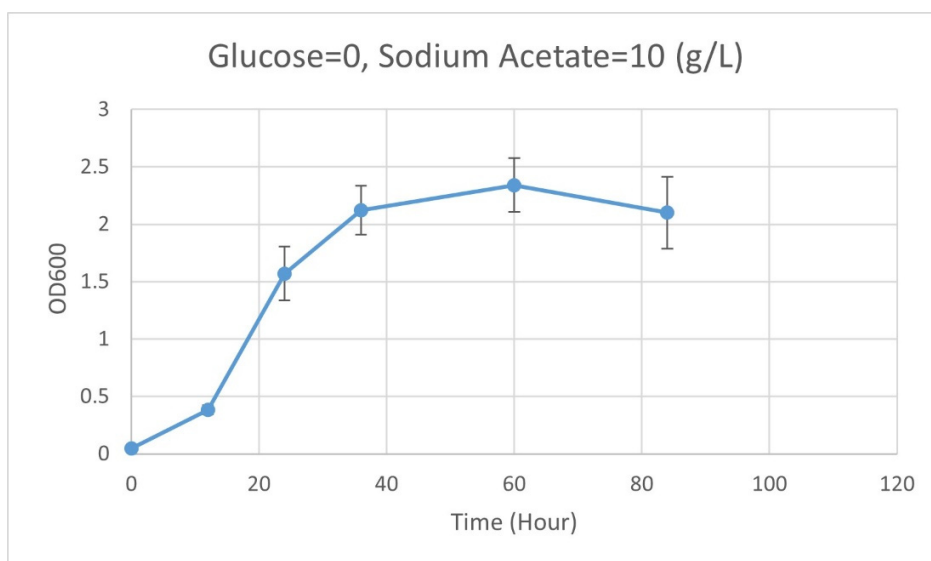

Figure S2: Growth curve of *Y. lipolytica* PHB32 using 10 g/L of sodium acetate as the only carbon and energy source.

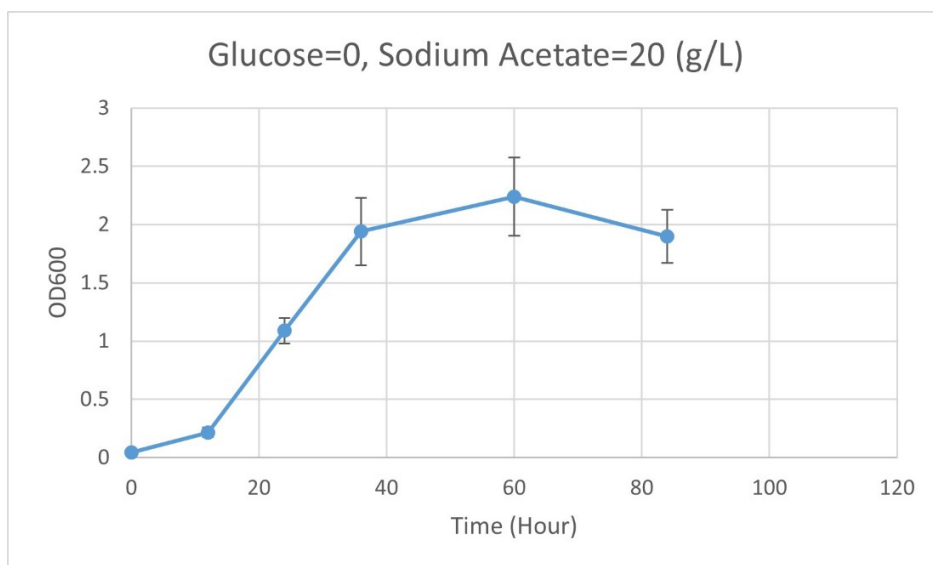

Figure S3: Growth curve of *Y. lipolytica* PHB32 using 20 g/L of sodium acetate as the only carbon and energy source.

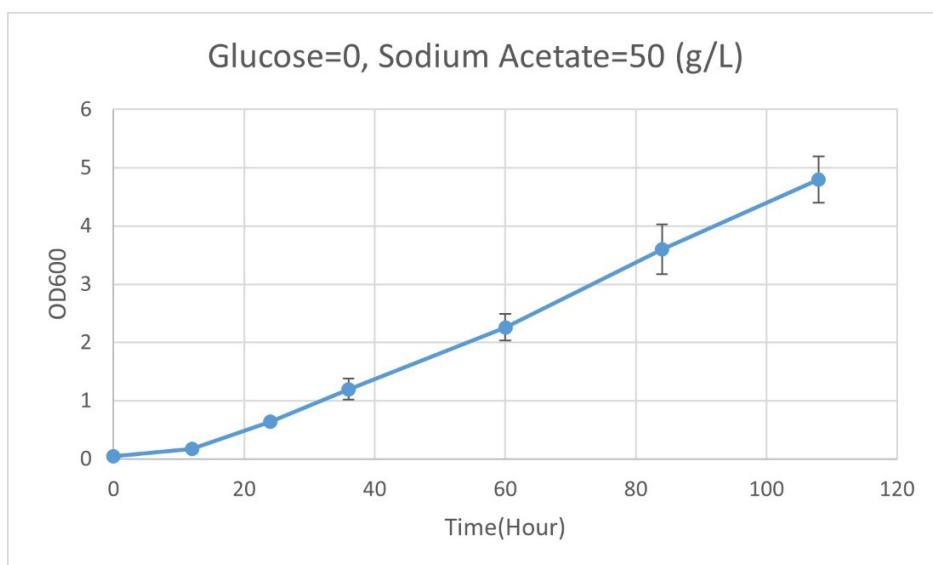

Figure S4: Growth curve of *Y. lipolytica* PHB32 using 50 g/L of sodium acetate as the only carbon and energy source.

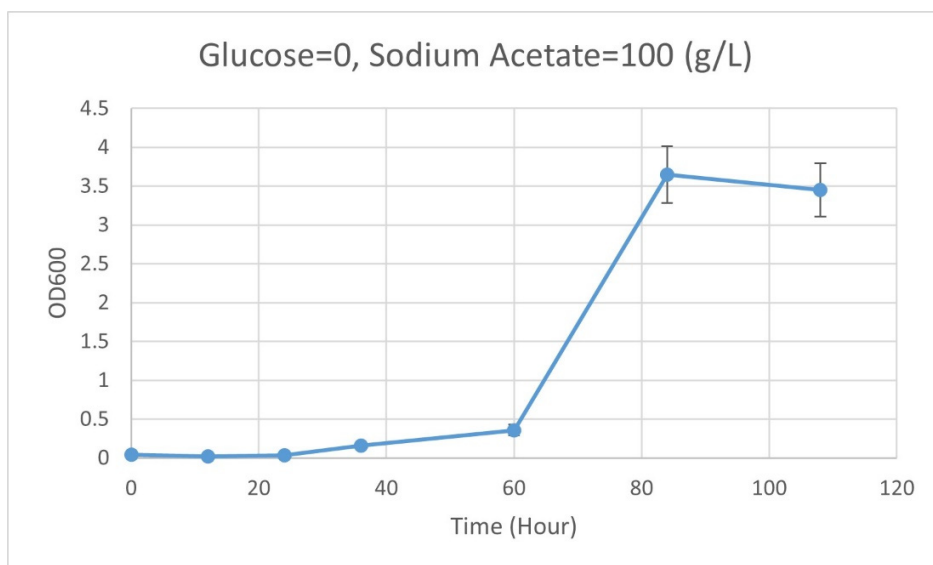

Figure S5: Growth curve of *Y. lipolytica* PHB32 using 100 g/L of sodium acetate as the only carbon and energy source.

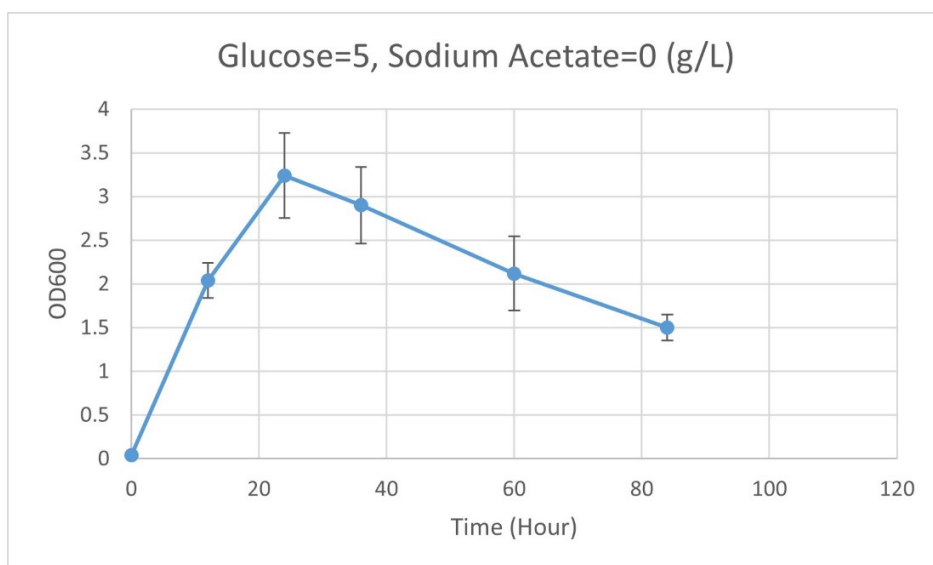

Figure S6: Growth curve of *Y. lipolytica* PHB32 using 5 g/L of glucose as the only carbon and energy source.

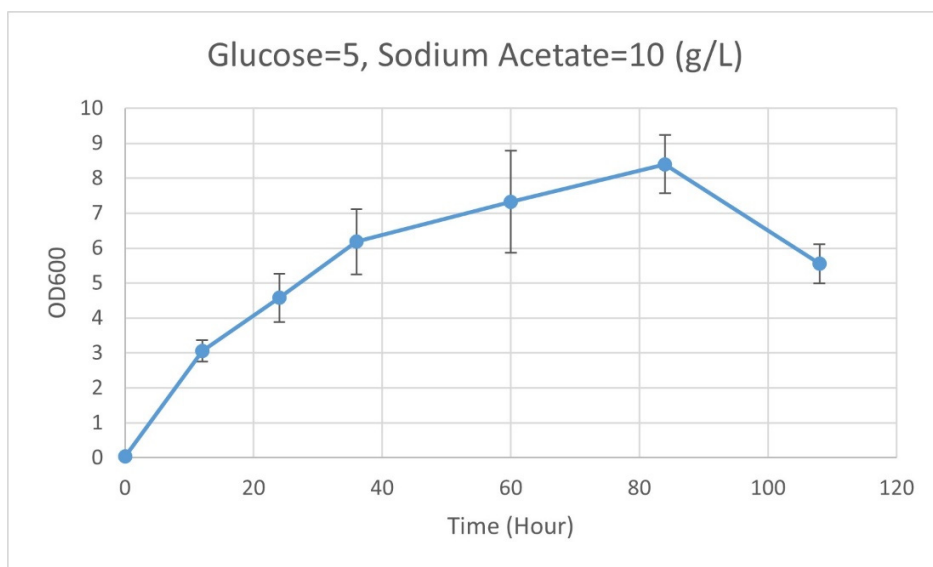

Figure S7: Growth curve of *Y. lipolytica* PHB32 using co-substrate strategy by 10 g/L of sodium acetate and 5 g/L of glucose.

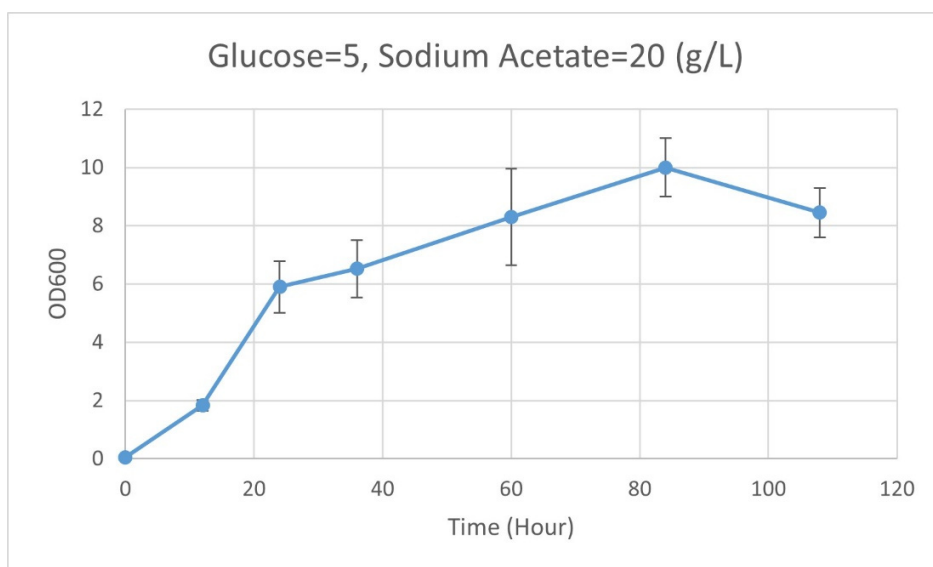

Figure S8: Growth curve of *Y. lipolytica* PHB32 using co-substrate strategy by 20 g/L of sodium acetate and 5 g/L of glucose.

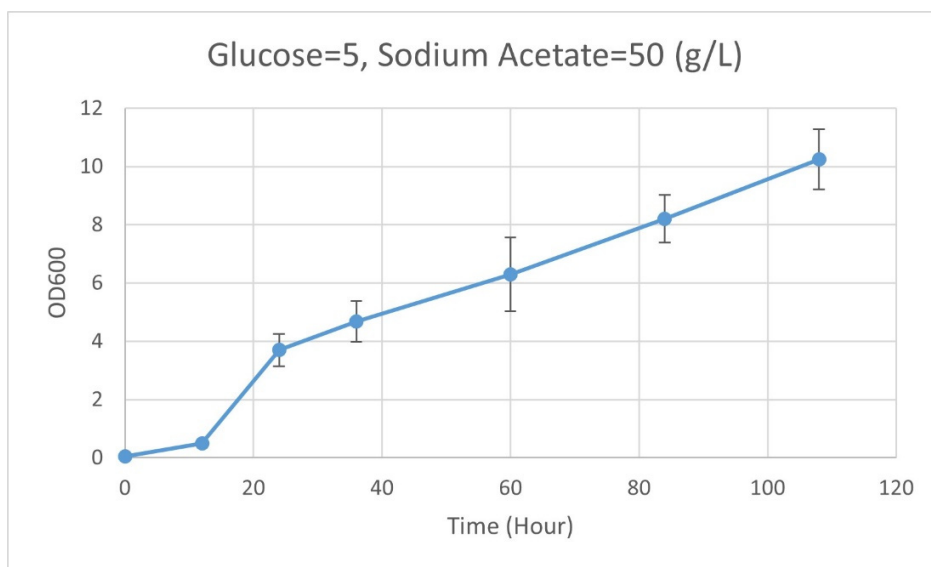

Figure S9: Growth curve of *Y. lipolytica* PHB32 using co-substrate strategy by 50 g/L of sodium acetate and 5 g/L of glucose.

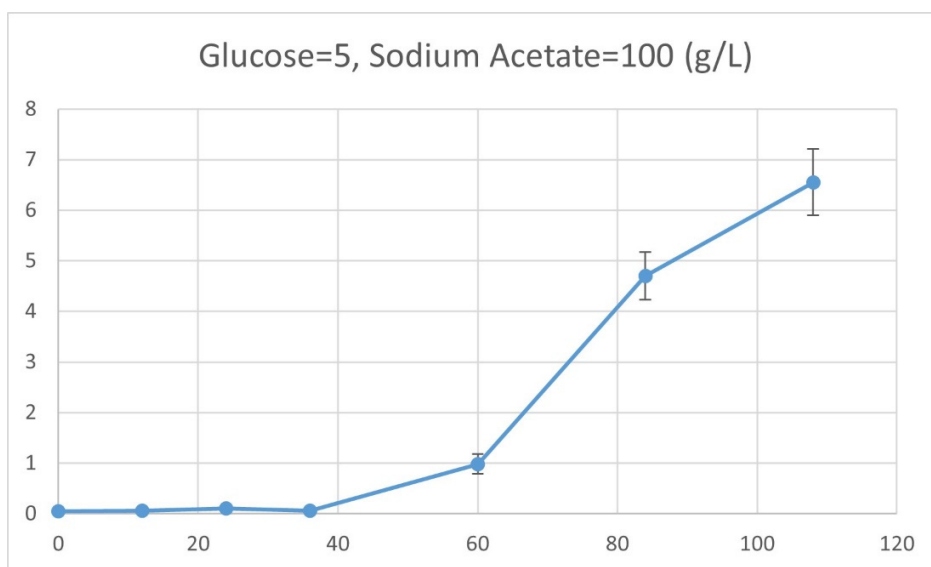

Figure S10: Growth curve of *Y. lipolytica* PHB32 using co-substrate strategy by 100 g/L of sodium acetate and 5 g/L of glucose.

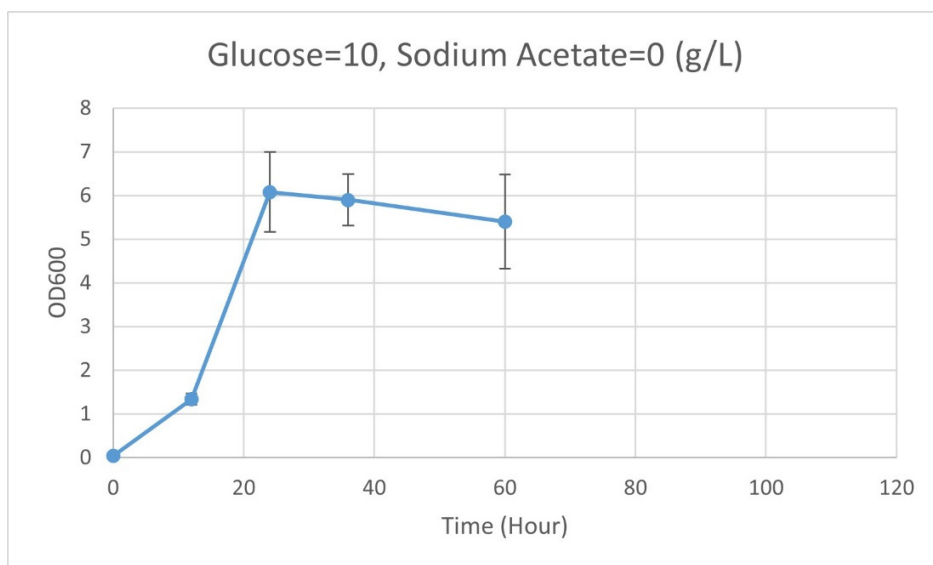

Figure S11: Growth curve of *Y. lipolytica* PHB32 using 10 g/L of glucose as the only carbon and energy source.

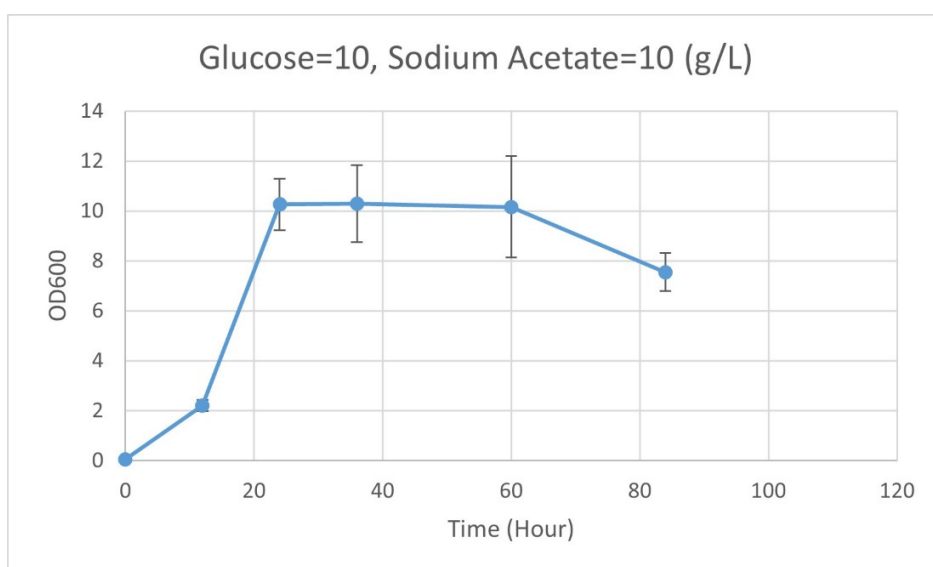

Figure S12: Growth curve of *Y. lipolytica* PHB32 using co-substrate strategy by 10 g/L of sodium acetate and 10 g/L of glucose.

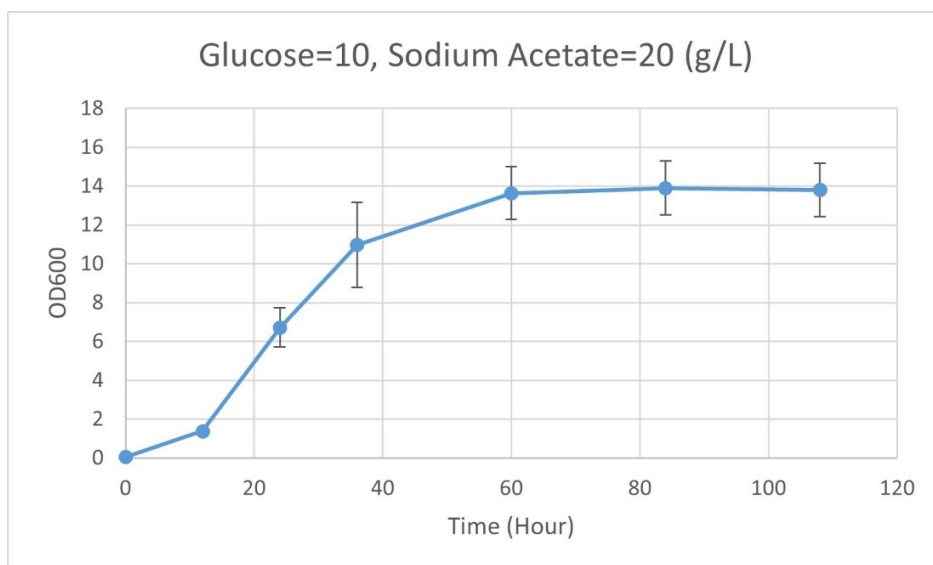

Figure S13: Growth curve of *Y. lipolytica* PHB32 using co-substrate strategy by 20 g/L of sodium acetate and 10 g/L of glucose.

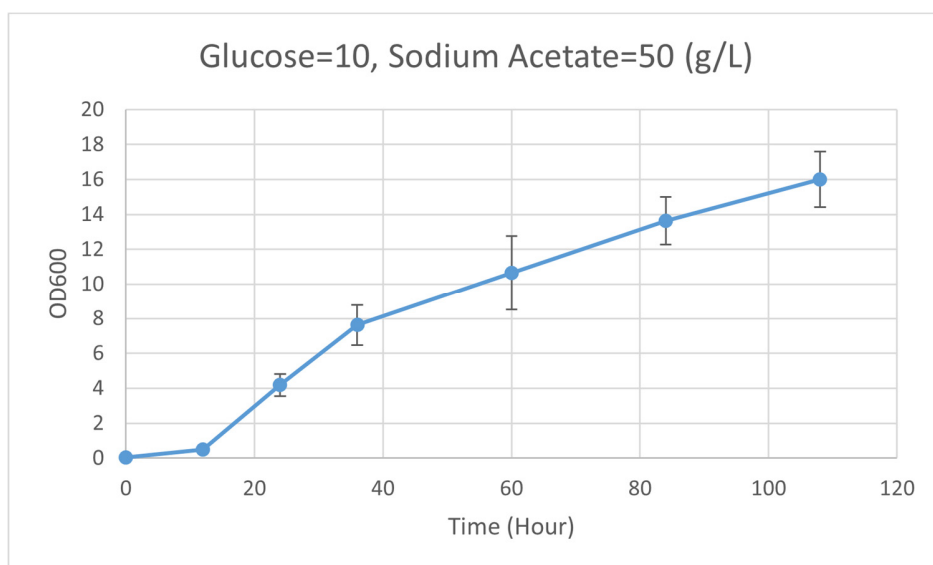

Figure S14: Growth curve of *Y. lipolytica* PHB32 using co-substrate strategy by 50 g/L of sodium acetate and 10 g/L of glucose.

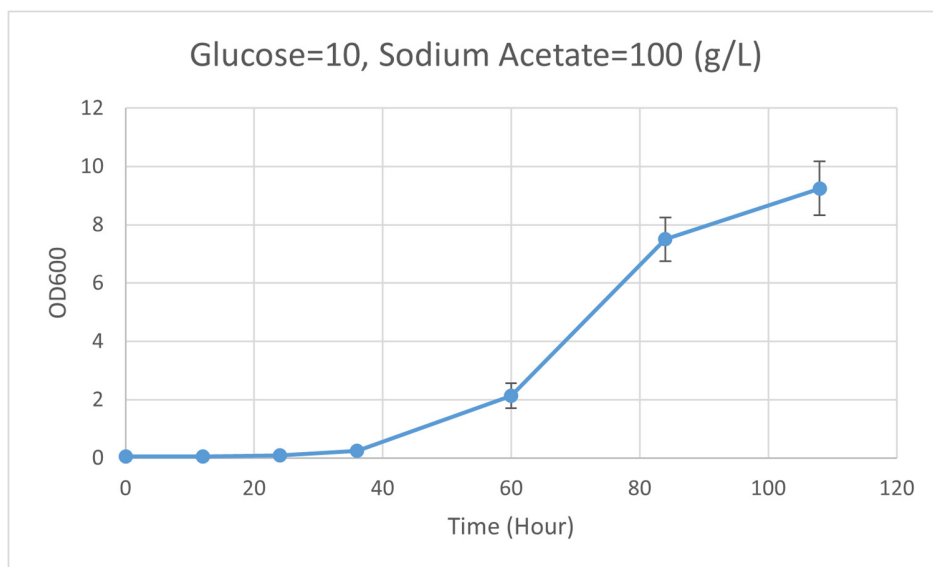

Figure S15: Growth curve of *Y. lipolytica* PHB32 using co-substrate strategy by 100 g/L of sodium acetate and 10 g/L of glucose.

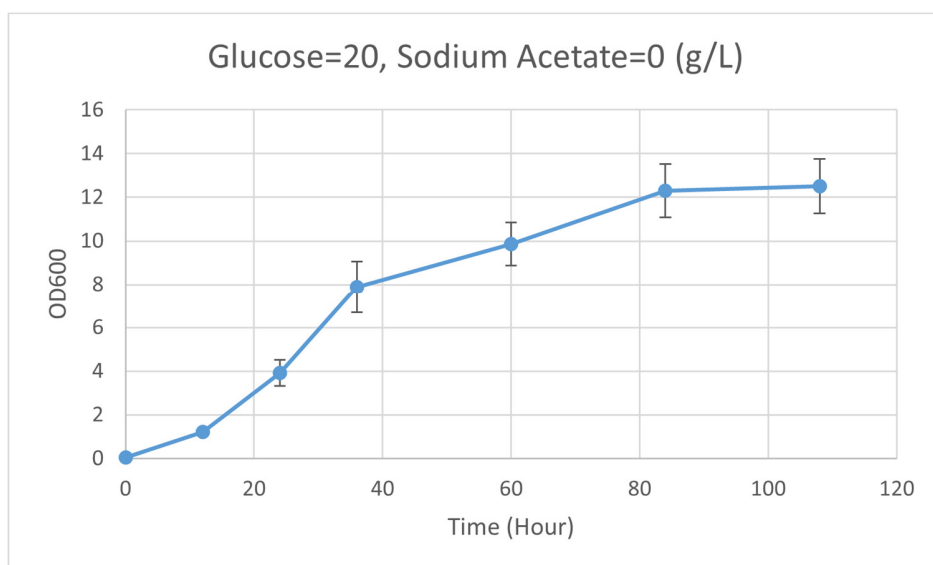

Figure S16: Growth curve of *Y. lipolytica* PHB32 using 20 g/L of glucose as the only carbon and energy source.



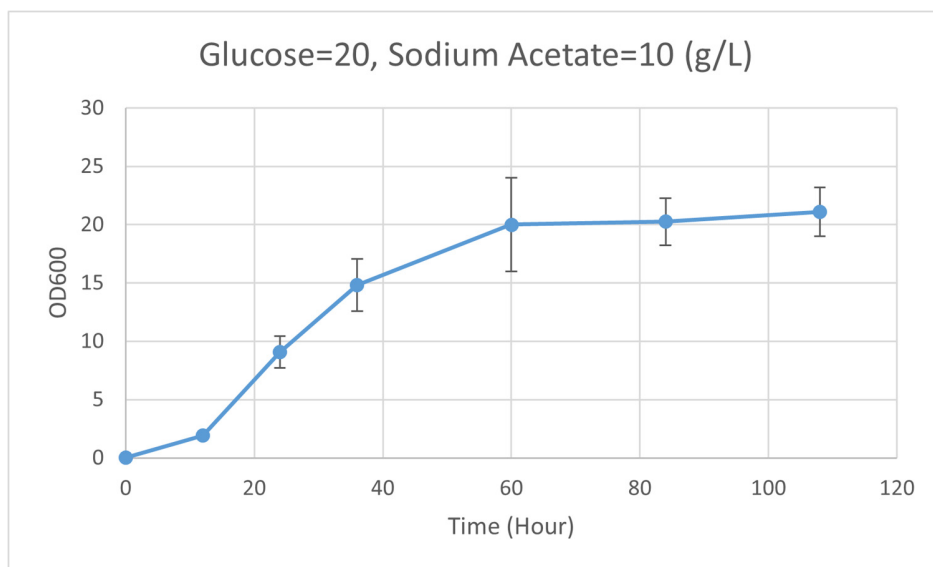

Figure S17: Growth curve of *Y. lipolytica* PHB32 using co-substrate strategy by 10 g/L of sodium acetate and 20 g/L of glucose.

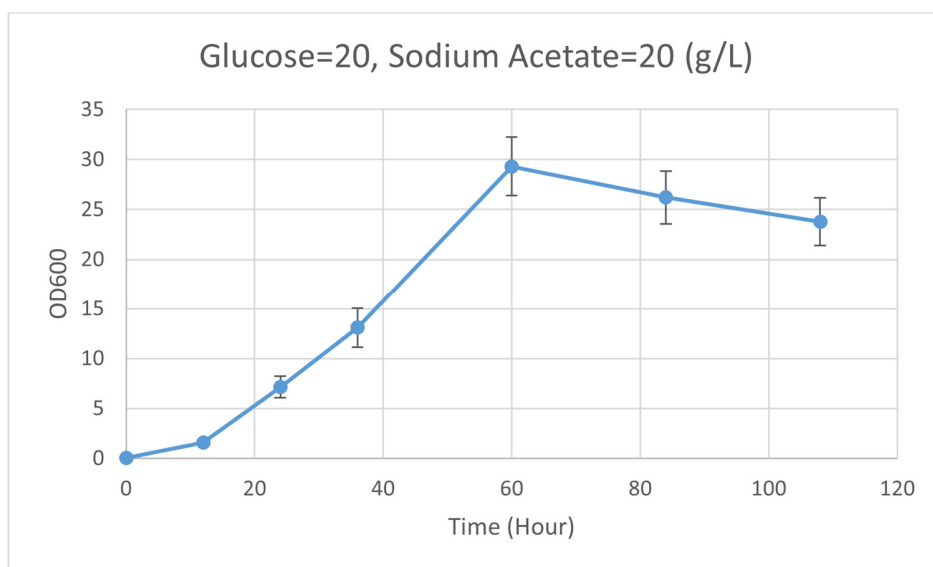

Figure S18: Growth curve of *Y. lipolytica* PHB32 using co-substrate strategy by 20 g/L of sodium acetate and 20 g/L of glucose.

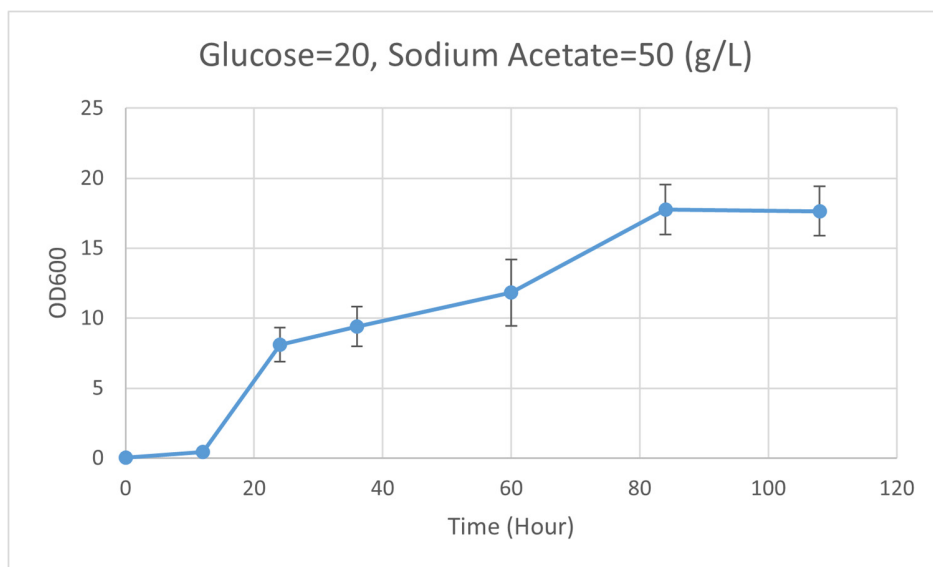

Figure S19: Growth curve of *Y. lipolytica* PHB32 using co-substrate strategy by 50 g/L of sodium acetate and 20 g/L of glucose.

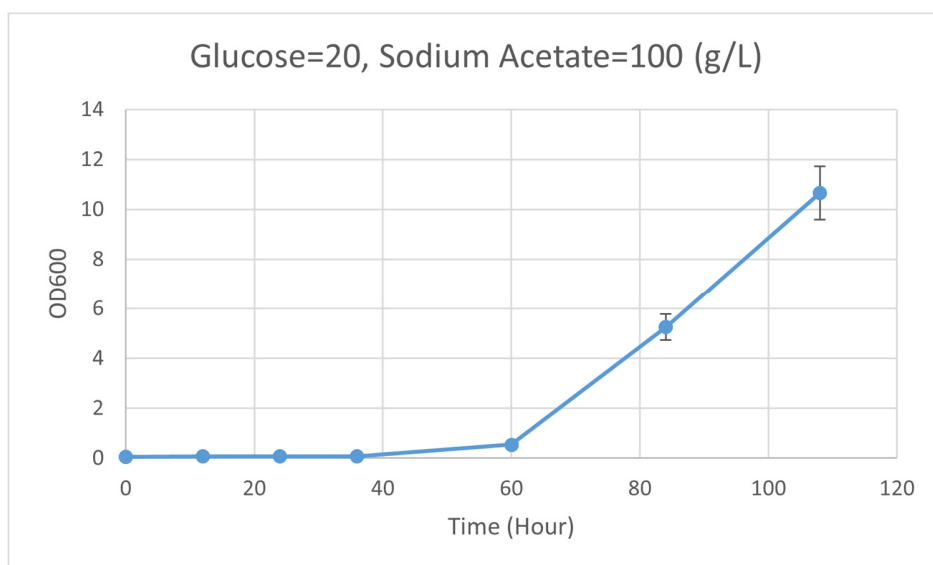

Figure S20: Growth curve of *Y. lipolytica* PHB32 using co-substrate strategy by 100 g/L of sodium acetate and 20 g/L of glucose.

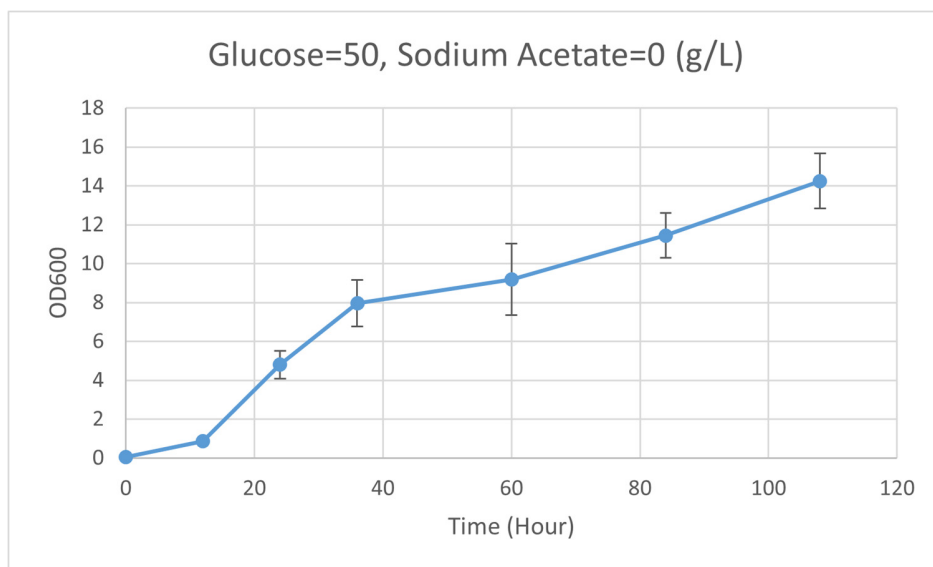

Figure S21: Growth curve of *Y. lipolytica* PHB32 using 50 g/L of glucose as the sole energy and carbon source.

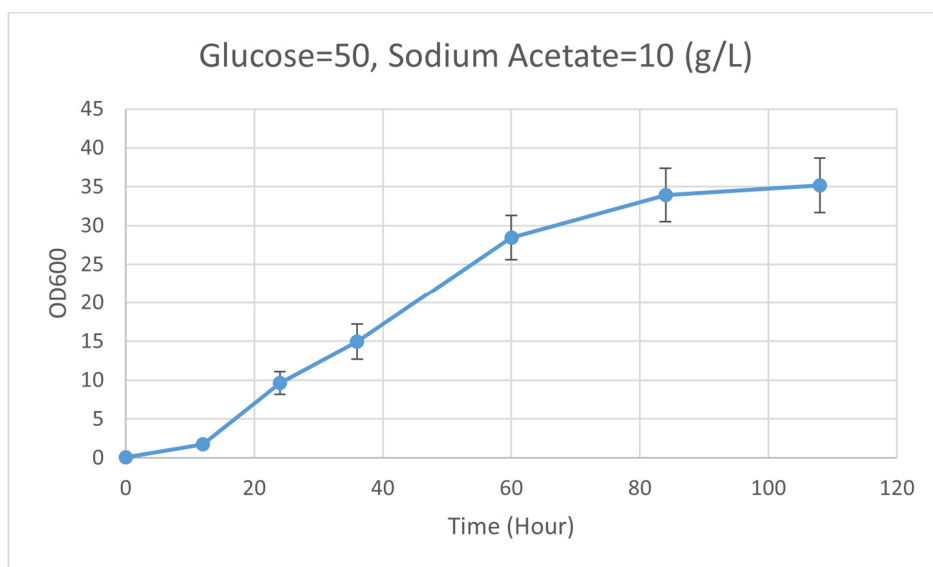

Figure S22: Growth curve of *Y. lipolytica* PHB32 using co-substrate strategy by 10 g/L of sodium acetate and 50 g/L of glucose.

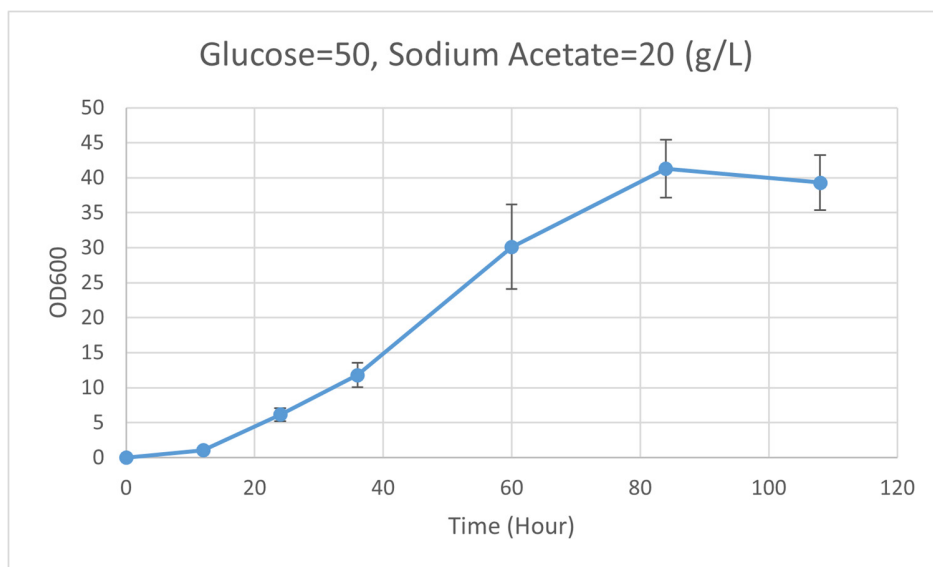

Figure S23: Growth curve of *Y. lipolytica* PHB32 using co-substrate strategy by 20 g/L of sodium acetate and 50 g/L of glucose.

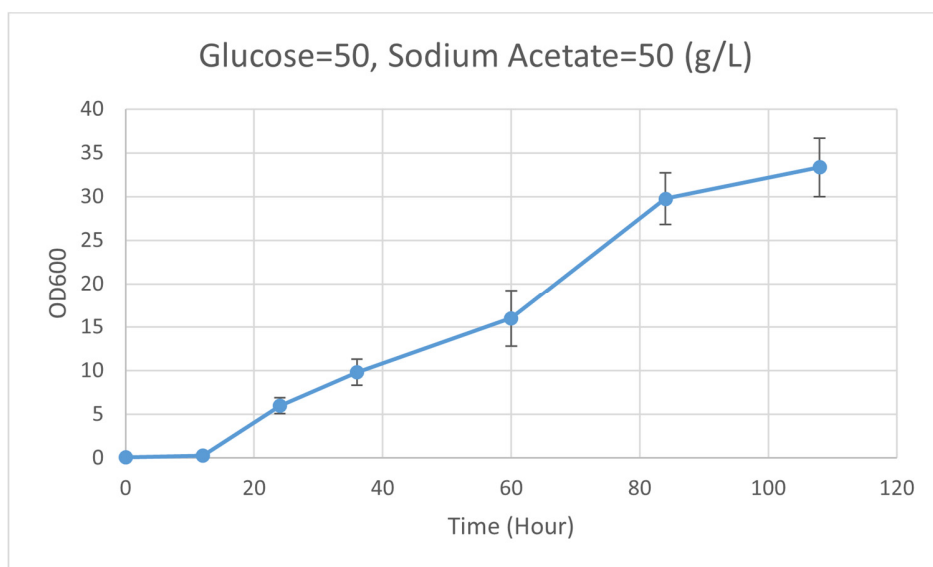

Figure S24: Growth curve of *Y. lipolytica* PHB32 using co-substrate strategy by 50 g/L of sodium acetate and 50 g/L of glucose.

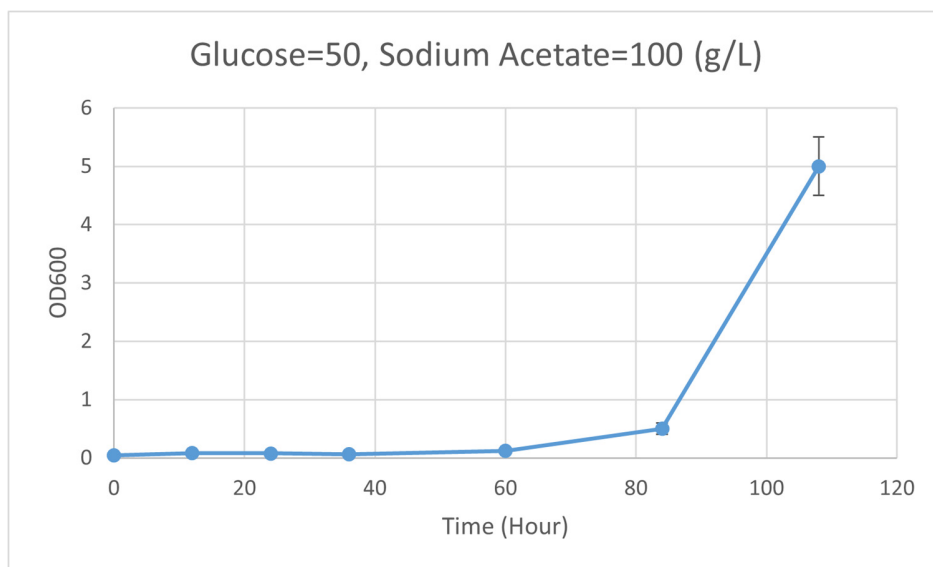

Figure S25: Growth curve of *Y. lipolytica* PHB32 using co-substrate strategy by 100 g/L of sodium acetate and 50 g/L of glucose.

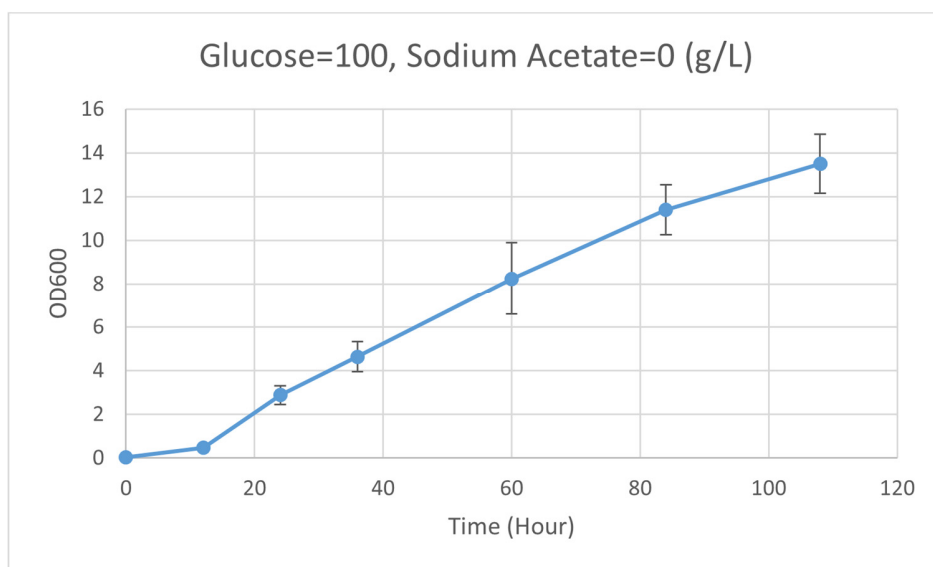

Figure S26: Growth curve of *Y. lipolytica* PHB32 using 100 g/L of glucose as sole carbon and energy source.

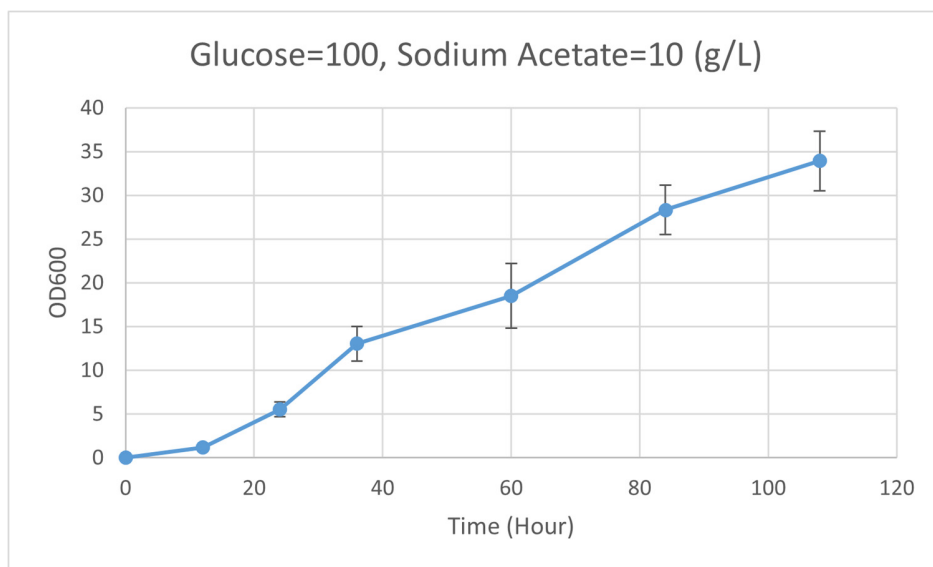

Figure S27: Growth curve of *Y. lipolytica* PHB32 using co-substrate strategy by 10 g/L of sodium acetate and 100 g/L of glucose.

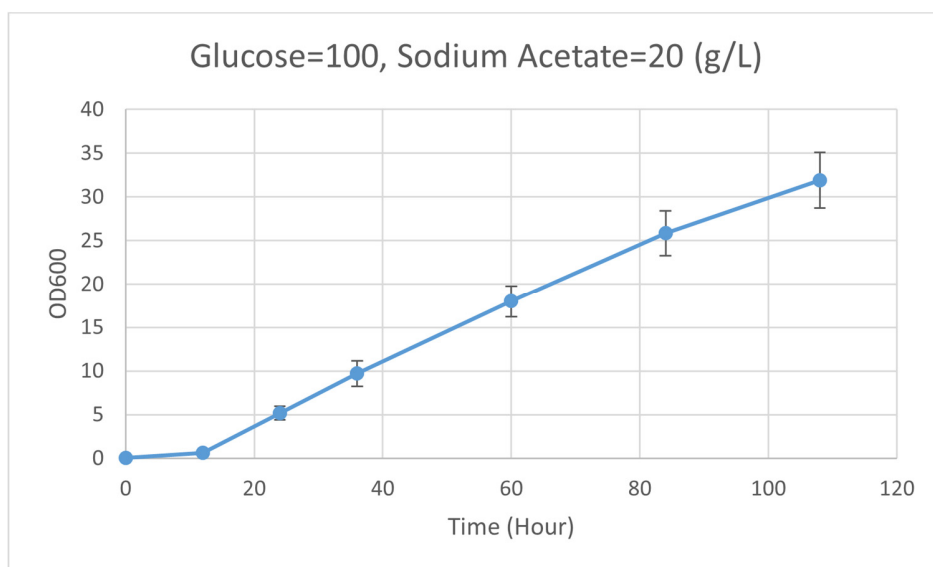

Figure S28: Growth curve of *Y. lipolytica* PHB32 using co-substrate strategy by 20 g/L of sodium acetate and 100 g/L of glucose.

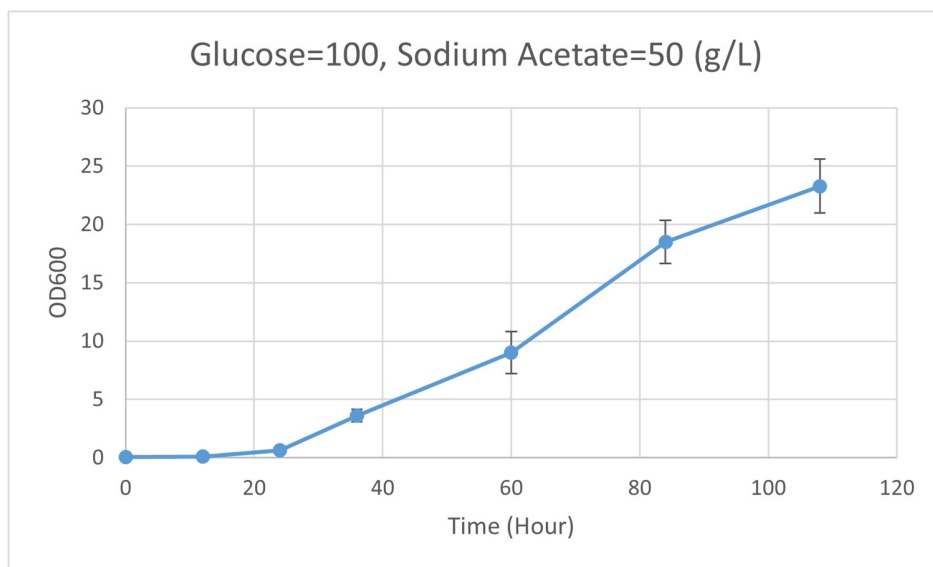

Figure S29: Growth curve of *Y. lipolytica* PHB32 using co-substrate strategy by 50 g/L of sodium acetate and 100 g/L of glucose.

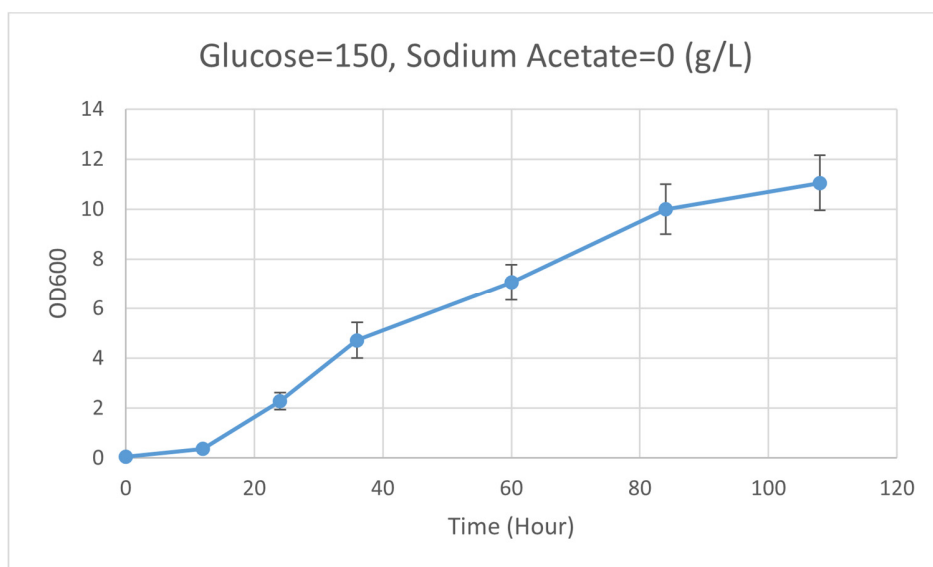

Figure S30: Growth curve of *Y. lipolytica* PHB32 using 150 g/L of glucose as the sole energy and carbon source.

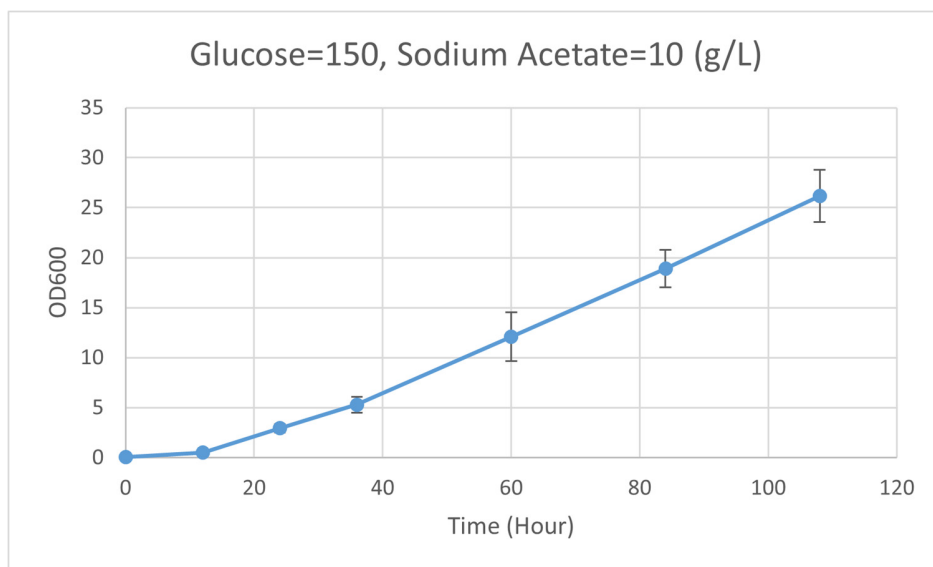

Figure S31: Growth curve of *Y. lipolytica* PHB32 using co-substrate strategy by 10 g/L of sodium acetate and 150 g/L of glucose.

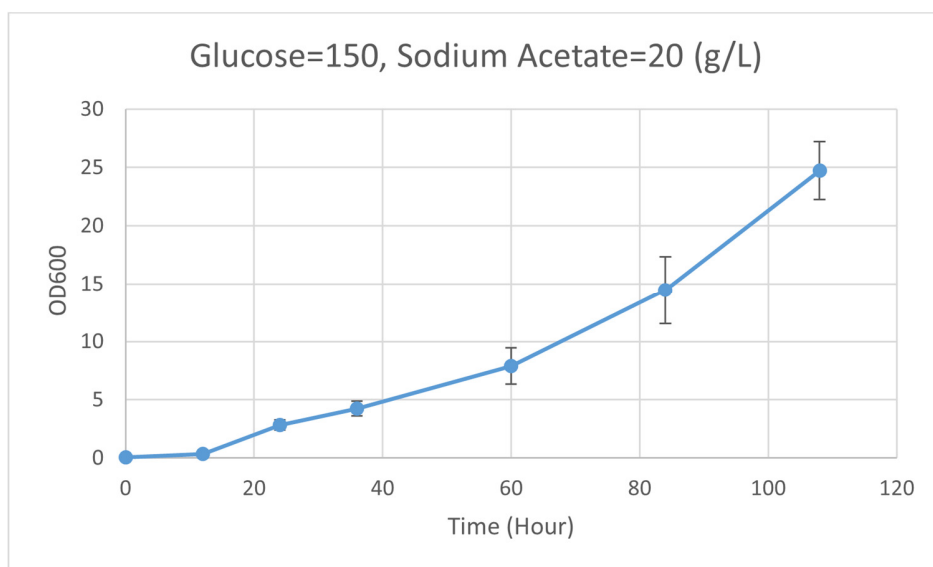

Figure S32: Growth curve of *Y. lipolytica* PHB32 using co-substrate strategy by 20 g/L of sodium acetate and 150 g/L of glucose.



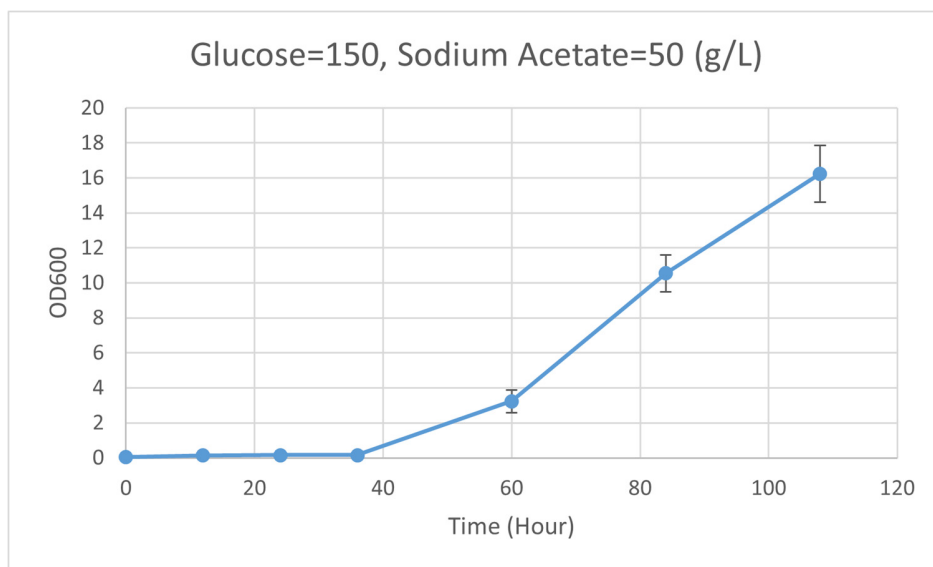

Figure S33: Growth curve of *Y. lipolytica* PHB32 using co-substrate strategy by 50 g/L of sodium acetate and 150 g/L of glucose.
